# Supplementary material
Source: MDPI journal article supplement (https://www.mdpi.com/2076-3263/13/4/110)
Supplement: s1 [file s1]

# Shallow Geothermal Potential of the Sant'Eufemia Plain (South Italy) for Heating and Cooling Systems: An Effective Renewable Solution in a Climate-Changing Society

Giovanni Vespasiano <sup>1,2</sup>, Giuseppe Cianflone <sup>1,2,\*</sup>, Marco Taussi <sup>3,\*</sup>, Rosanna De Rosa <sup>1</sup>, Rocco Dominici <sup>1,2</sup> and Carmine Apollaro <sup>1</sup>

<sup>1</sup> Department of Biology, Ecology and Earth Sciences (DIBEST), University of Calabria, Via Ponte Bucci 4, Cubo 15B, 87036 Rende, Italy

<sup>2</sup> E3 (Earth, Environment, Engineering) Spin-Off, University of Calabria, Via Ponte Bucci, Cubo 15B, 87036 Rende, Italy

<sup>3</sup> Department of Pure and Applied Sciences, University of Urbino Carlo Bo, Via Ca' Le Suore 2/4, 61029 Urbino, Italy

\* Correspondence: giuseppe.cianflone@unical.it (G.C.); marco.taussi@uniurb.it (M.T.)

## Supplementary Material

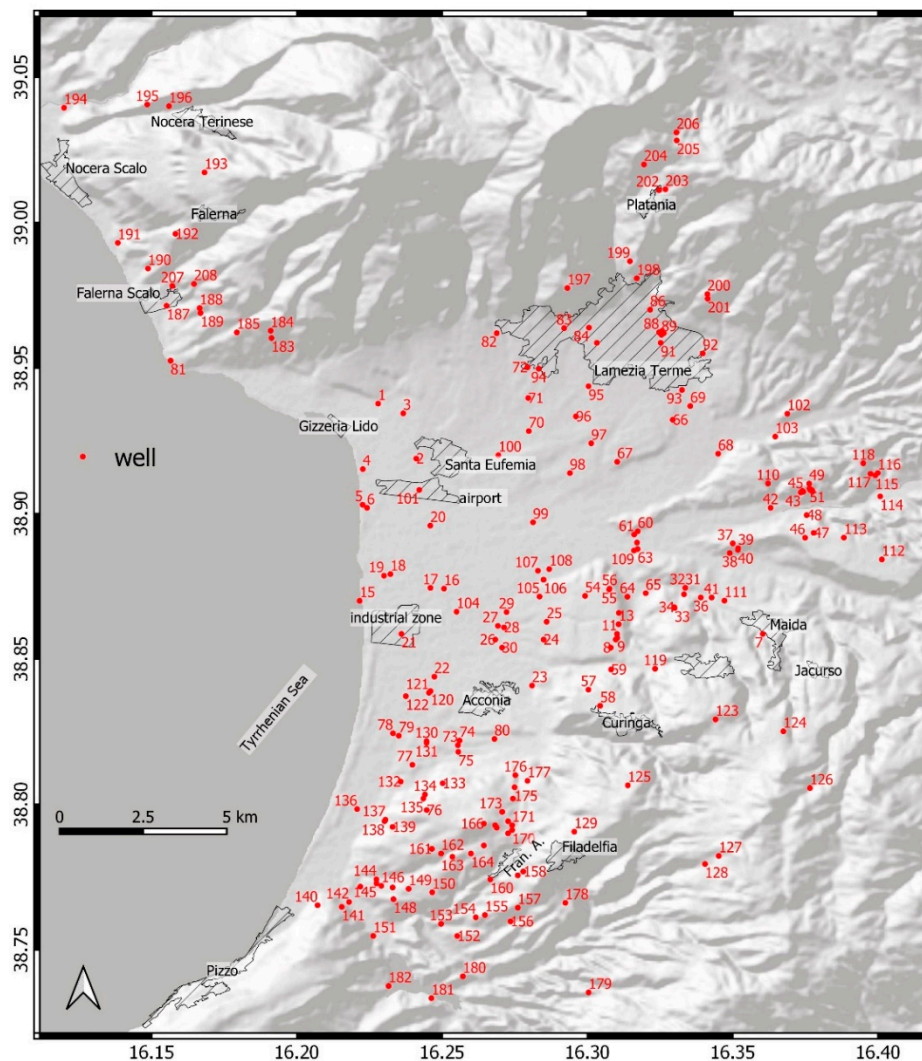

**Figure S1.** Location and ID of each borehole (more details in [Table S2](#)) used to reconstruct the geothermal potential in the Sant'Eufemia Plain.

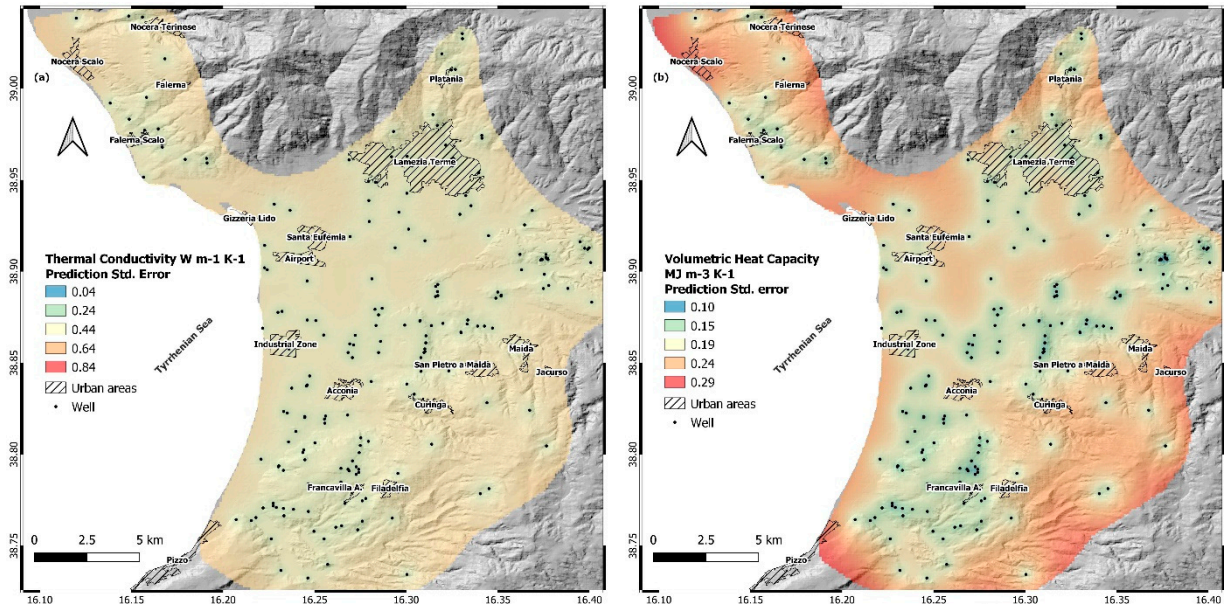

**Figure S2.** (a,b) Maps of the *Prediction Standard Error* of the estimated *thermal conductivity* ( $\lambda$ ) and *volumetric heat capacity* ( $\rho_c$ ) of the ground averaged over 100 m of depth from the surface in the Sant'Eufemia Plain.

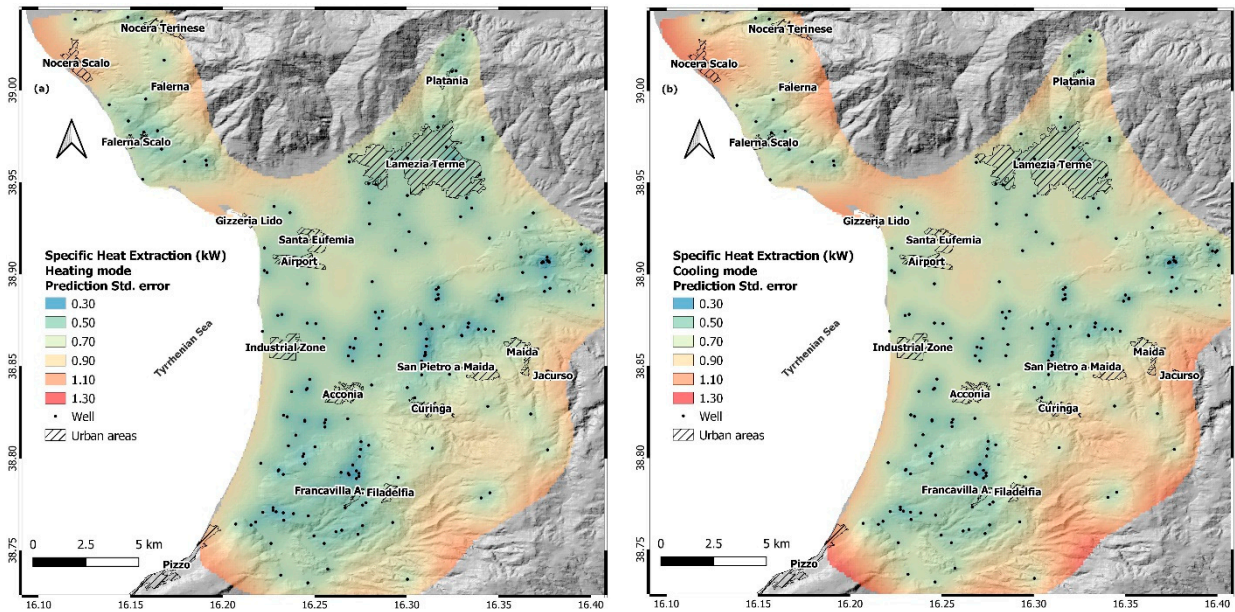

**Figure S3.** Maps of the *Prediction Standard Error* of the estimated *specific heat extraction* (SHE) for (a) *heating* and (b) *cooling* for 100 m depth boreholes in the Sant'Eufemia Plain.



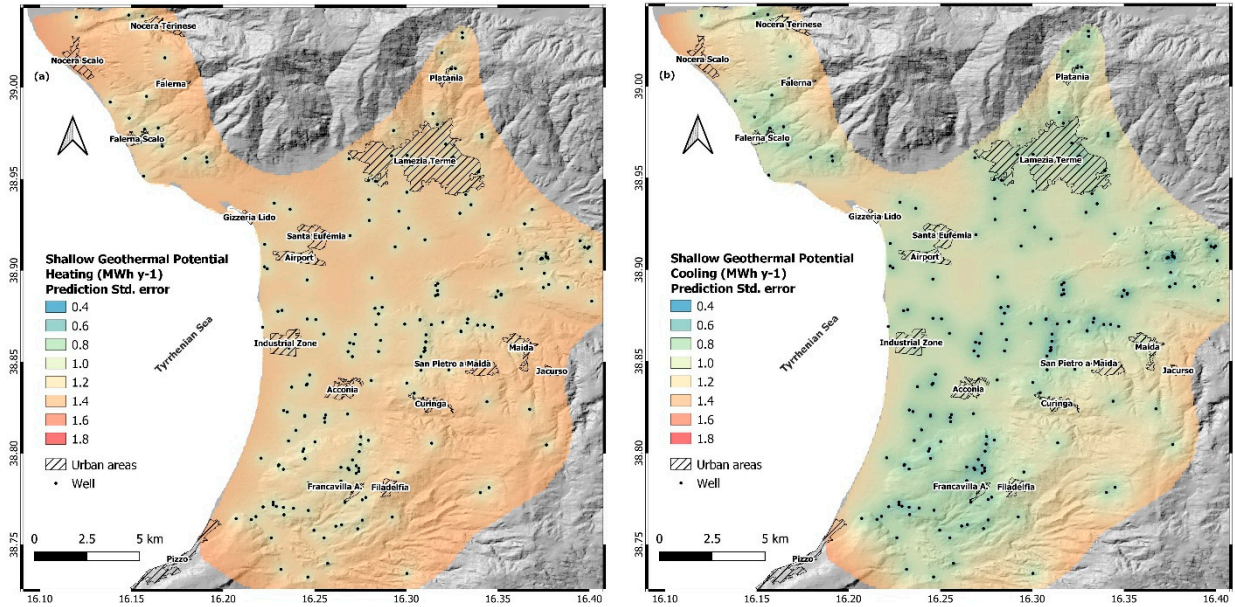

**Figure S4.** Maps of the *Prediction Standard Error* of the estimated Shallow geothermal potential for space (a) heating and (b) cooling in Sant'Eufemia Plain with 100-meter BHE length.

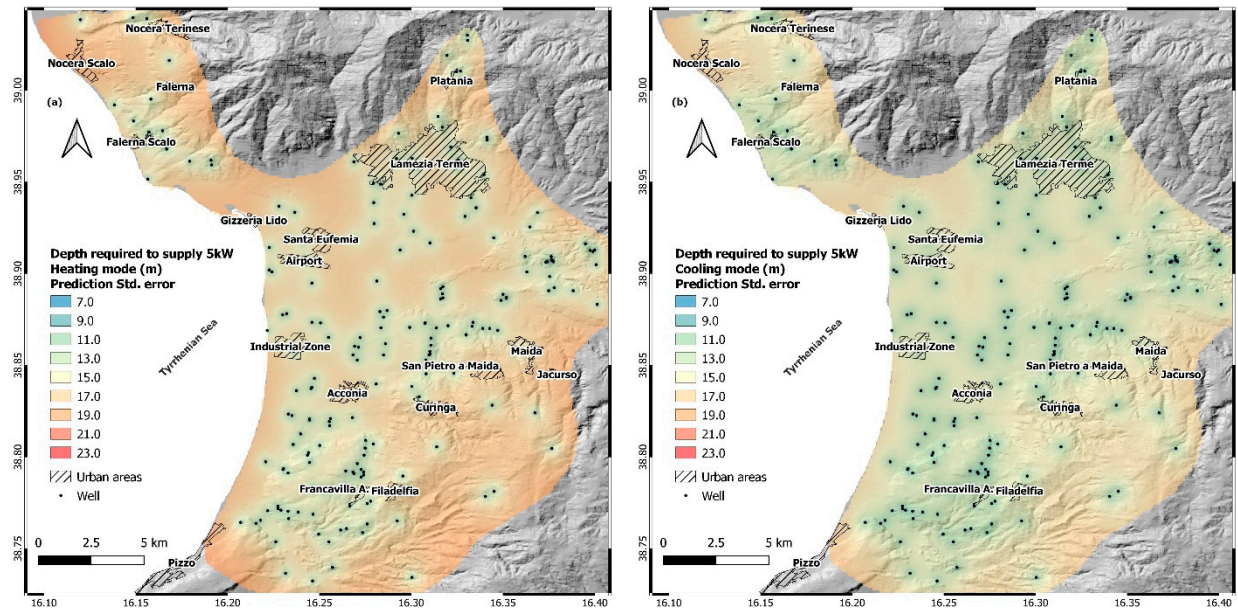

**Figure S5.** Maps of the *Prediction Standard Error* of the estimated depth to be drilled for supply a fixed domestic energy demand of 5.0 kW for space (a) heating and (b) cooling in Sant'Eufemia Plain.

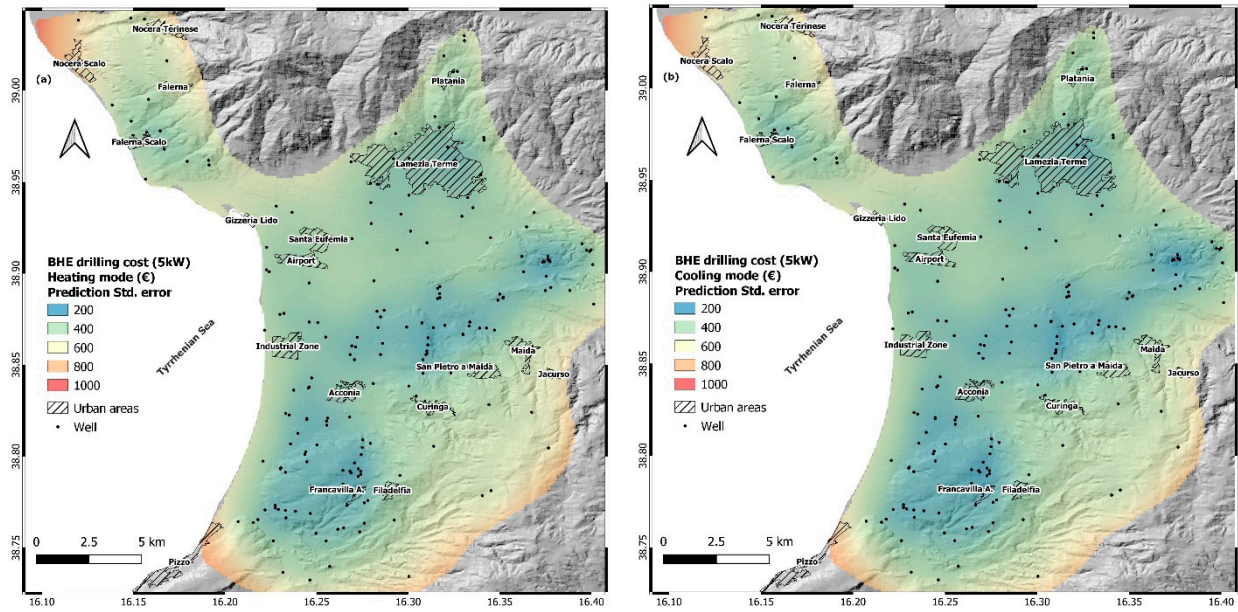

**Figure S6.** Drilling cost *Prediction Standard Error* maps for space (a) heating and (b) cooling. Costs are calculated on the basis of the BHE length required.
