# Supplementary material
Source: MDPI journal article supplement (https://www.mdpi.com/2076-3263/13/4/110)
Supplement: s1 [file s1]

Archive with 2 entries (2 files):
- geosciences-2286599-supplementary.pdf
- Tables S1 and S2_rev.xlsx
