# Supplementary material
Source: MDPI journal article supplement (https://www.mdpi.com/2076-3263/13/4/110)
Supplement: s1 [file s1 › Tables S1 and S2_rev.xlsx]

## Sheet: Table S1
	Table S1 - Thermal conductivity (λ, expressed in Wm−1 K−1) and volumetric heat capacity (SVC, expressed in MJ m−3 K−1) derived from Di Sipio et al., (2014), Della Santa et al., (2020), VDI 4640, Andujar Marquez et al., (2016) and Viesi et al., (2018).
	Lithology (dry)	λ	SVC	Lithology (wet)	λ	SVC			Lithology
	GW	0.4	1.6	GWs	1.8	2.4			GW	well sorted Gravel
	GP	0.4	1.6	GPs	1.8	2.4			GP	Poor sorted Gravel
	GM	0.7	1.6	GMs	1.6	2.4			GM	Silty Gravel
	GC	0.7	1.6	GCs	1.6	2.4			GC	Clayey Gravel
	SW	0.5	1.6	SWs	2.2	2.9			SW	well sorted Sand
	SP	0.6	1.6	SPs	2.6	2.9			SP	Poor sorted Sand
	SM	0.5	1.6	SMs	1.7	2.9			SM	Silty Sand
	SC	0.6	1.6	SCs	1.7	2.9			SC	Clayey Sand
	OL	0.7	1.6	OLs	1.6	3.4			OL	Organic Silt
	OH	0.7	1.6	OHs	1.6	3.4			OH	Organic Clay
	MH	0.5	1.6	MHs	1.7	3.4			MH	Inorganic Silt
	ML	0.5	1.6	MLs	1.7	3.4			ML	Inorganic Clayey Silt
	CL	0.7	1.6	CLs	1.6	3.4			CL	Inorganic Clay with medium-low plasticity
	CH	0.9	1.6	CHs	1.5	3.4			CH	Inorganic Clay with high plasticity
	PT	0.4	3.8	PTs	0.4	3.8			PT	Peat
	SF	2.2	2.2	SFs	2.2	2.2			SF	Metapelites and slates
	SBG	2.9	2.4	SBGs	2.9	2.4			SBG	Gneiss
	TDL	2.8	2.4	TDLs	2.8	2.4			TDL	Limestone

## Sheet: Table S2
Codice	Source	lat	long	Altitude (m a.s.l.)	Piezometric level (m a.s.l.)	Satured thick (m) (for depth of 100m)	Ground T (°C)	λtot (W m-1 K-1)	sHE (kW) for heating	sHE (kW) for cooling	ρc (106 Jm-3K-1) (SVC)	tc (days) heating	tc (days) cooling	u's	u'c for heating	Pmax for heating	u'c for cooling	Pmax for cooling	QBHE (MWh/y) heating	QBHE (MWh/y) cooling	BHE Depth 5kW for heating (m)	BHE Depth 5kW for cooling (m)	Drilling Cost 5kW (Heating)	Drilling Cost 5kW (Cooling)	stratigraphic log
																									from m b.g.l.	to m b.g.l.	Lithology	from m b.g.l.	to m b.g.l.	Lithology	from m b.g.l.	to m b.g.l.	Lithology	from m b.g.l.	to m b.g.l.	Lithology	from m b.g.l.	to m b.g.l.	Lithology	from m b.g.l.	to m b.g.l.	Lithology	from m b.g.l.	to m b.g.l.	Lithology	from m b.g.l.	to m b.g.l.	Lithology	from m b.g.l.
1	CASMEZ	38.9378	16.228	93	78	85	16.2584	1.585	5.22361	5.81647	2.28	122	120	1.2829e-06	0.000191909	7.74719	0.000195107	7.71561	6.96249	7.05044	95.7193	85.9628	6893.75	6273.24	0	15	GC	15	40	GCs	40	45	GWs	45	100	GWs
2	CASMEZ	38.9189	16.2411	51.58	45.58	94	16.4227	1.552	5.12191	5.70323	3.202	122	120	1.83999e-06	0.000275244	7.38977	0.000279832	7.35836	7.17264	7.13626	97.6198	87.6696	6981.32	6440.03	0	6	SM	6	11	GWs	11	20	CLs	20	24	GWs	24	27	CLs	27	100	CLs
3	CASMEZ	38.9344	16.2366	96	76	80	16.2465	1.52	5.16722	5.75368	2.24	122	120	1.31429e-06	0.000196604	7.72323	0.000199881	7.69166	6.74578	6.84003	96.7639	86.9009	6960.18	6332.9	0	20	GP	20	52	GPs	52	100	GPs
4	CASMEZ	38.9153	16.2227	46.5	43.5	97	16.4428	1.543	5.09469	5.67292	3.247	122	120	1.87673e-06	0.000280741	7.37017	0.00028542	7.33877	7.16254	7.11079	98.1415	88.1381	7037.3	6493.11	0	3	PT	3	14.5	GWs	14.5	21.5	SCs	21.5	22.5	GWs	22.5	40	CLs	40	41	SWs	41	44	CHs	44	100	CHs
5	CASMEZ	38.903	16.2226	72	70	98	16.3417	1.583	5.16603	5.75236	3.329	122	120	1.87551e-06	0.000280557	7.37082	0.000285233	7.33942	7.26818	7.29484	96.7861	86.9209	6991.17	6454.5	0	2	GP	2	5.5	GPs	5.5	21	CLs	21	100	CLs
6	CASMEZ	38.9019	16.2241	70	68	98	16.3496	1.632	5.27395	5.87252	3.084	122	120	1.68531e-06	0.000252106	7.47679	0.000256308	7.44534	7.36457	7.38485	94.8057	85.1423	6883.43	6357.74	0	2	GP	2	30	GPs	30	35	CLs	35	100	CLs
7	CASMEZ	38.8586	16.3603	300	260	60	15.4375	1.9204	6.57987	7.32667	2.1306	122	120	9.89455e-07	0.000148013	8.00459	0.00015048	7.97289	7.53155	8.33381	75.9893	68.2438	4823.2	4330.59	0	2.3	PT	2.3	4.7	CL	4.7	9.1	CL	9.1	40	GP	40	100	SBGs
8	CASMEZ	38.8539	16.308	7.42	-16.58	76	16.5978	1.8552	5.9347	6.60828	2.6276	122	120	1.26315e-06	0.000188955	7.76256	0.000192104	7.73097	8.00901	7.81712	84.2502	75.6627	6088.41	5621.25	0	3	SC	3	6.5	CH	6.5	10	CH	10	11.5	SM	11.5	20	CH	20	21.8	PT	21.8	24	SW	24	100	SWs
9	CASMEZ	38.8572	16.3102	4	-24	72	16.6113	1.368	4.85513	5.40617	2.536	122	120	1.65329e-06	0.000247316	7.49581	0.000251438	7.46434	6.47379	6.31123	102.984	92.4869	7116.72	6545.69	0	5	SP	5	6	GW	6	10	SC	10	14	GP	14	15	SM	15	28	SM	28	100	SCs
10	CASMEZ	38.8567	16.3097	6.3	-17.7	76	16.6022	1.538	5.16484	5.75104	2.296	122	120	1.33138e-06	0.000199161	7.71043	0.00020248	7.67886	6.95165	6.78282	96.8084	86.9409	6742.21	6114.64	0	1	PT	1	2.5	MH	2.5	9	CH	9	11	PT	11	12.5	CH	12.5	13	PT	13	14	CH	14	16	MH	16
11	CASMEZ	38.8586	16.3101	6.2	-26.8	67	16.6026	1.3981	4.93575	5.49594	2.1536	122	120	1.37377e-06	0.000205502	7.67936	0.000208927	7.64781	6.45798	6.30131	101.302	90.9762	7050.99	6394.28	0	2	OL	2	3.5	OH	3.5	4.5	SM	4.5	12.8	OH	12.8	13.5	PT	13.5	21.4	OH	21.4	21.5	PT	21.5	26	GW	26
12	CASMEZ	38.8619	16.3107	6.2	-25.95	67.85	16.6026	1.72385	5.68368	6.32876	2.49525	122	120	1.29092e-06	0.000193109	7.74101	0.000196328	7.70943	7.58411	7.39897	87.9711	79.0044	6215.85	5728.06	0	0.5	OL	0.5	2.5	SW	2.5	15.2	CH	15.2	20	CH	20	20.6	PT	20.6	32.15	SW	32.15	100	SWs
13	CASMEZ	38.8619	16.3107	6.85	-22.85	70.3	16.6	1.4665	5.04396	5.61643	2.1976	122	120	1.33645e-06	0.00019992	7.70666	0.000203252	7.6751	6.69267	6.53188	99.1284	89.0244	6933.01	6290.39	0	0.7	PT	0.7	3.8	CL	3.8	12.8	CH	12.8	13.7	PT	13.7	19.3	CH	19.3	29.7	GP	29.7	100	GPs
14	CASMEZ	38.8658	16.3108	6.8	-24.2	69	16.6002	1.3934	4.87404	5.42723	2.519	122	120	1.61227e-06	0.00024118	7.5207	0.0002452	7.48923	6.54967	6.39275	102.584	92.1281	7021.39	6452.57	0	0.9	PT	0.9	2.8	OH	2.8	5.1	CH	5.1	6	CL	6	8.5	SM	8.5	21.4	CH	21.4	21.5	PT	21.5	31	SM	31
15	CASMEZ	38.87	16.2216	7.5	6.7	99.2	16.5975	1.7371	5.49932	6.12348	2.5985	122	120	1.33409e-06	0.000199566	7.70841	0.000202892	7.67685	7.6526	7.46997	90.9203	81.6529	6581.17	5991.77	0	0.8	PT	0.8	3	MHs	3	5.2	CHs	5.2	7.8	SMs	7.8	8.5	GPs	8.5	10	SMs	10	22	CHs	22	22.2	PTs	22.2
16	CASMEZ	38.8742	16.2506	8	2.5	94.5	16.5955	1.6867	5.41367	6.02811	2.5258	122	120	1.33551e-06	0.000199779	7.70736	0.000203109	7.67579	7.47846	7.30171	92.3587	82.9448	6629.42	6030.69	0	0.5	PT	0.5	5.5	SC	5.5	7.6	OHs	7.6	10	SMs	10	15.8	CHs	15.8	16	PTs	16	22.5	CHs	22.5	30	GPs	30
17	CASMEZ	38.8744	16.246	7.1	2.1	95	16.599	1.71	5.46353	6.08362	2.5115	122	120	1.30985e-06	0.000195941	7.72658	0.000199207	7.69501	7.54598	7.36468	91.5159	82.1878	6580.41	5987.15	0	0.5	PT	0.5	5	SP	5	6	Ols	6	10	SMs	10	16.3	CHs	16.3	17.2	SPs	17.2	20.7	CHs	20.7	21.5	MHs	21.5
18	CASMEZ	38.8792	16.2322	8.5	6.5	98	16.5935	1.7212	5.49665	6.1205	2.6186	122	120	1.35682e-06	0.000202968	7.69166	0.00020635	7.66011	7.6092	7.43087	90.9645	81.6927	6572.94	5983.25	0	2	PT	2	4	PTs	4	5.3	CLs	5.3	7.8	SMs	7.8	8.2	GPs	8.2	8.5	MHs	8.5	11.3	SMs	11.3	16.3	Ohs	16.3
19	CASMEZ	38.8786	16.23	5.9	3.4	97.5	16.6038	1.7489	5.53583	6.16412	2.4955	122	120	1.27256e-06	0.000190363	7.75521	0.000193535	7.72362	7.6595	7.47145	90.3208	81.1145	6527.4	5941.88	0	2.5	PT	2.5	6.5	CHs	6.5	7	SMs	7	7.8	OHs	7.8	8	GWs	8	9	CLs	9	100	GWs
20	CASMEZ	38.8958	16.2459	8.41	1.41	93	16.5938	1.775	5.6552	6.29705	2.814	122	120	1.41388e-06	0.000211502	7.65084	0.000215027	7.61931	7.82592	7.64214	88.4142	79.4023	6471.33	5981.08	0	7	SW	7	39	SWs	39	69	GWs	69	100	CLs
21	CASMEZ	38.8586	16.236	7	4	97	16.5994	1.784	5.63129	6.27043	2.492	122	120	1.24577e-06	0.000186355	7.77629	0.000189461	7.74469	7.76056	7.57345	88.7896	79.7394	6425.42	5849.82	0	3	PT	3	6	CLs	6	10	SPs	10	24	GWs	24	100	GWs
22	CASMEZ	38.8439	16.2473	4.51	1.51	97	16.6093	2.1091	6.42416	7.15328	2.8654	122	120	1.21164e-06	0.00018125	7.80382	0.00018427	7.77221	8.79674	8.57437	77.8312	69.898	5932.42	5500.85	0	0.2	PT	0.2	3	SP	3	17.5	SWs	17.5	26	SMs	26	100	SWs
23	CASMEZ	38.8408	16.2809	20.52	-9.48	70	16.5458	1.3995	4.95812	5.52085	2.27	122	120	1.44657e-06	0.000216392	7.62819	0.000219999	7.59666	6.47864	6.3605	100.845	90.5657	7067.92	6414.18	0	5	PT	5	6	SM	6	9	GW	9	13	GW	13	19.5	SM	19.5	26	GW	26	30	CL	30	100	GWs
24	CASMEZ	38.8567	16.2849	10.7	-21.3	68	16.5848	1.368	4.90723	5.46419	2.144	122	120	1.39773e-06	0.000209087	7.66222	0.000212572	7.63068	6.34987	6.20791	101.89	91.5049	7139.03	6478.51	0	3	SM	3	4	ML	4	7	SM	7	16	SW	16	16.5	GP	16.5	32	GP	32	100	GPs
25	CASMEZ	38.8628	16.2859	8.9	-23.1	68	16.5919	1.943	6.3916	7.11702	2.5104	122	120	1.15227e-06	0.000172369	7.85361	0.000175242	7.82198	8.22137	8.02903	78.2277	70.2541	5687.19	5253.42	0	0.5	PT	0.5	3.2	SP	3.2	3.8	CH	3.8	5.5	SM	5.5	6	CH	6	7.5	23.7	ML	23.7	24.4	PT	24.4	29.5	SP
26	CASMEZ	38.8567	16.2683	7.3	-1.7	91	16.5982	2.3241	7.14677	7.95791	2.8358	122	120	1.08819e-06	0.000162783	7.91032	0.000165496	7.87866	9.35079	9.1244	69.9616	62.8306	5449.11	5061.18	0	0.5	PT	0.5	1.4	CL	1.4	3	OL	3	9	SM	9	13	SPs	13	14	CLs	14	21	CHs	21	21.2	PTs	21.2
27	CASMEZ	38.8614	16.2692	9.6	-0.9	89.5	16.5891	2.155	6.72687	7.49035	2.863	122	120	1.18484e-06	0.000177241	7.82599	0.000180195	7.79437	8.91038	8.70391	74.3288	66.7526	5672.89	5260.74	0	2.5	PT	2.5	4	CH	4	4.5	OL	4.5	7	SP	7	10	ML	10	10.5	SP	10.5	11.5	GWs	11.5	14	SPs	14
28	CASMEZ	38.8608	16.2713	12.97	1.47	88.5	16.5758	2.0055	6.24414	6.95283	2.7815	122	120	1.23692e-06	0.000185031	7.78336	0.000188115	7.75176	8.47164	8.28785	80.0751	71.9132	5994.69	5550.68	0	1	PT	1	5	SM	5	7	GM	7	8	OL	8	11.5	CH	11.5	12.5	PTs	12.5	100	SWs
29	CASMEZ	38.8661	16.2721	14.8	-0.2	85	16.5685	1.6	5.29352	5.89432	2.324	122	120	1.29539e-06	0.000193778	7.73758	0.000197008	7.706	7.14097	6.99274	94.4551	84.8274	6758.14	6145.82	0	2	PT	2	4	GM	4	8	SW	8	15	GW	15	100	GWs
30	CASMEZ	38.8539	16.2706	21	10	89	16.5439	1.424	4.87795	5.43158	3.134	122	120	1.96279e-06	0.000293615	7.32573	0.000298508	7.29435	6.78783	6.66598	102.502	92.0542	7200.91	6632.55	0	1	PT	1	3.6	ML	3.6	9	SW	9	11	CH	11	20	GPs	20	43	CHs	43	100	CHs
31	CASMEZ	38.8745	16.3337	15.9	-19.1	65	16.5641	1.9007	6.28705	7.00061	2.456	122	120	1.15239e-06	0.000172387	7.85351	0.00017526	7.82188	8.07214	7.90711	79.5286	71.4224	5748.76	5307.78	0	0.5	PT	0.5	7	SM	7	8	SP	8	10	GP	10	13.5	ML	13.5	15.8	CH	15.8	19	ML	19	31	OH	31
32	CASMEZ	38.8744	16.3336	12.5	-21.5	66	16.5776	1.9535	6.372	7.09521	2.458	122	120	1.12216e-06	0.000167864	7.87986	0.000170662	7.84822	8.22793	8.04777	78.4683	70.4701	5681.87	5246.77	0	6	SM	6	7	CH	7	12.5	SP	12.5	13	CH	13	17	SP	17	18	ML	18	24	CH	24	27	ML	27
33	CASMEZ	38.8675	16.33	9.5	-25.5	65	16.5895	1.3805	4.90614	5.46298	2.164	122	120	1.398e-06	0.000209127	7.66203	0.000212612	7.63049	6.39895	6.25264	101.913	91.5252	7062.27	6401.6	0	4	SW	4	5.5	CH	5.5	8	SM	8	12	ML	12	16.5	CH	16.5	18	PT	18	24	CH	24	24.5	PT	24.5
34	CASMEZ	38.8678	16.3299	8.97	-26.03	65	16.5916	1.3784	4.90478	5.46146	2.208	122	120	1.4286e-06	0.000213704	7.64058	0.000217266	7.60905	6.40637	6.25851	101.941	91.5506	7105.47	6444.62	0	2.5	PT	2.5	3	CH	3	5	ML	5	8.5	GW	8.5	8.9	ML	8.9	13	CH	13	14.5	PT	14.5	22.5	CH	22.5
35	CASMEZ	38.8722	16.3332	8.7	-36.3	55	16.5927	1.2374	4.66988	5.19989	2.0642	122	120	1.48774e-06	0.000222552	7.60037	0.000226261	7.56886	5.88794	5.75183	107.069	96.1558	7394.8	6700.71	0	0.5	PT	0.5	7	SP	7	7.3	CH	7.3	12.5	SP	12.5	16.2	CH	16.2	16.5	PT	16.5	19.5	ML	19.5	23.7	CH	23.7
36	CASMEZ	38.8711	16.339	10	-24	66	16.5875	1.356	5.0921	5.67004	2.618	122	120	1.72185e-06	0.000257572	7.45553	0.000261865	7.42409	6.44753	6.30194	98.1913	88.1828	7282.8	6738.34	0	3	SM	3	5	ML	5	9	SM	9	11.5	ML	1.5	15	SW	15	18.5	CH	18.5	19.5	ML	19.5	20	SM	20
37	CASMEZ	38.8897	16.35	23.2	-26.8	50	16.5352	1.099	4.49078	5.00047	1.99	122	120	1.61488e-06	0.000241571	7.5191	0.000245597	7.48763	5.36269	5.27189	111.339	99.9906	7138.86	6521.49	0	37	SP	37	45	CH	45	50	SW	50	80	SWs	80	100	SPs
38	CASMEZ	38.8864	16.3489	21.5	-28.5	50	16.5419	1.2065	4.60053	5.12268	2	122	120	1.47839e-06	0.000221152	7.60662	0.000224838	7.57511	5.74568	5.64381	108.683	97.6052	7331.84	6627.29	0	8	SP	8	19	CH	19	22	ML	22	25	CH	25	25.5	SP	25.5	37	ML	37	40	GP	40	45	ML	45
39	CASMEZ	38.8881	16.3518	21.5	-30.5	48	16.5419	1.141	4.37976	4.87685	2.508	122	120	1.96032e-06	0.000293245	7.32698	0.000298133	7.2956	5.65824	5.55864	114.162	102.525	7494.79	6861.77	0	2	PT	2	20	CH	20	23	SP	23	32	CH	32	34	SW	34	37	CH	34	37	CH	37	41	GW	41
40	CASMEZ	38.8875	16.3518	22	-29	49	16.54	1.108	4.33545	4.82751	2.526	122	120	2.0332e-06	0.000304146	7.29081	0.000309215	7.25945	5.54314	5.44689	115.328	103.573	7530.66	6891.18	0	2	PT	2	22	CL	22	30	CH	30	34	CL	34	37	CH	37	41	SW	41	48	CH	48	51	SW	51
41	CASMEZ	38.8711	16.3427	35	1	66	16.4884	1.158	4.45204	4.95734	2.898	122	120	2.23191e-06	0.000333871	7.19839	0.000339436	7.16708	5.79692	5.72814	112.308	100.861	7605.55	6982.82	0	5	PT	5	8	GW	8	10	SW	10	14	SP	14	19	SC	19	25	SW	25	28	SC	28	31	GW	31
42	CASMEZ	38.902	16.363	22.68	-13.82	63.5	16.5373	1.234	4.58759	5.10827	2.798	122	120	2.02217e-06	0.000302497	7.2962	0.000307539	7.26483	6.05836	5.95451	108.99	97.8806	7443.44	6839.1	0	2.5	PT	2.5	4	ML	4	6.5	GC	6.5	17.5	GC	23	36.5	SW	36.5	100	CLs
43	CASMEZ	38.9072	16.3734	32	-34.5	33.5	16.5003	0.865	4.09365	4.55827	1.905	122	120	1.96411e-06	0.000293811	7.32507	0.000298708	7.29369	4.45736	4.3993	122.14	109.691	8183.23	7505.98	0	3.5	PT	3.5	6	RI	6	8	GM	8	18	GW	18	51	GP	51	66.5	GW	66.5	100	GWs
44	CASMEZ	38.9078	16.3739	33.47	-33.53	33	16.4945	0.888	4.17398	4.64771	1.962	122	120	1.97048e-06	0.000294764	7.32186	0.000299677	7.29048	4.56051	4.50389	119.79	107.58	8366.56	7702.34	0	67	GW	67	97	GWs	95	100	CLs
45	CASMEZ	38.9075	16.3743	32	-32	36	16.5003	0.853	4.04265	4.50148	2.256	122	120	2.35872e-06	0.000352841	7.14362	0.000358722	7.11233	4.50067	4.4424	123.681	111.075	8371.46	7685.66	0	9	PT	9	13	GW	13	50	GW	50	64	GW	64	83	GWs	83	100	CHs
46	CASMEZ	38.8917	16.3749	22.37	-47.63	30	16.5385	1.022	4.17501	4.64886	2.14	122	120	1.86745e-06	0.000279352	7.37509	0.000284008	7.34368	5.12654	5.0384	119.76	107.553	7606.16	6942.1	0	10	SC	10	14	SP	14	17	CH	17	19	SW	19	27	CH	27	28	GW	28	37	CH	37	38	SP	38
47	CASMEZ	38.8933	16.3778	22	-48	30	16.54	1.1835	4.79074	5.33448	1.99	122	120	1.49958e-06	0.000224323	7.59251	0.000228062	7.56101	5.66224	5.56313	104.368	93.7299	6842.42	6263.71	0	7.5	ML	7.5	9	SM	9	18	GP	18	18.5	CH	18.5	21	SP	21	24	CH	24	25	SP	25	70	SP	70
48	CASMEZ	38.8995	16.3754	21.5	-16.5	62	16.5419	1.8175	6.13352	6.82965	2.439	122	120	1.1968e-06	0.00017903	7.81604	0.000182014	7.78442	7.81798	7.67687	81.5193	73.2102	5838.65	5386.63	0	1.5	PT	1.5	18	SW	18	20	SC	20	21	GW	21	23	ML	23	30	SW	30	32	GC	32	35	ML	35
49	CASMEZ	38.9103	16.3763	39.36	-26.64	34	16.4711	0.829	3.94407	4.39171	2.322	122	120	2.49801e-06	0.000373677	7.08676	0.000379905	7.0555	4.41389	4.37068	126.772	113.851	8070.42	7367.48	0	5	PT	5	11	GW	11	28	ML	28	66	ML	66	100	CHs
50	CASMEZ	38.9081	16.3772	25.09	-39.91	35	16.5277	0.945	4.14726	4.61796	2.23	122	120	2.10455e-06	0.00031482	7.25662	0.000320067	7.22528	4.85828	4.78073	120.562	108.273	7686.55	7018.04	0	5	SW	5	17	SP	17	30	SC	30	36	ML	36	65	ML	65	100	MLs
51	CASMEZ	38.9086	16.3764	24	-42	34	16.532	0.919	4.11212	4.57883	2.344	122	120	2.27472e-06	0.000340276	7.17956	0.000345947	7.14825	4.78794	4.70952	121.592	109.198	7733.4	7059.18	0	6	PT	6	23	SP	23	66	ML	66	100	MLs
52	CASMEZ	38.9081	16.3767	22	-44	34	16.54	0.966	4.13423	4.60345	2.212	122	120	2.04218e-06	0.00030549	7.28644	0.000310581	7.25508	4.93667	4.85133	120.941	108.614	7744.02	7073.41	0	5	GP	5	17	SP	17	30	SC	30	66	CL	66	100	CLs
53	CASMEZ	38.9075	16.3774	22	-44	34	16.54	1.28	4.97766	5.54261	2.108	122	120	1.46875e-06	0.00021971	7.61311	0.000223372	7.58159	6.02972	5.92387	100.449	90.2102	6583.22	6026.24	0	3	PT	3	5	SP	5	8	SW	8	19	SM	19	39	CL	39	48	SP	48	66	SP	66	100	SPs
54	CASMEZ	38.8717	16.2992	10	-32	58	16.5875	1.247	4.63478	5.16081	2.365	122	120	1.69142e-06	0.000253019	7.47321	0.000257236	7.44176	6.0075	5.87211	107.88	96.884	7272.68	6674.49	0	0.5	PT	0.5	5	SM	5	25	CL	25	32	GP	32	33.5	SP	33.5	42	CL	42	100	SMs
55	CASMEZ	38.8739	16.3074	13	-33	54	16.5756	1.2	4.56852	5.08703	2.474	122	120	1.83867e-06	0.000275047	7.39048	0.000279631	7.35907	5.86943	5.74484	109.445	98.2892	7256.59	6649.73	0	1	PT	1	8	ML	8	17	ML	17	18	SW	18	35	CL	35	36	SW	36	39	ML	39	46	SP	46
56	CASMEZ	38.8742	16.3076	13	-31.5	55.5	16.5756	1.298	4.71012	5.24471	2.441	122	120	1.67718e-06	0.000250889	7.48159	0.000255071	7.45013	6.1995	6.06742	106.154	95.3342	7091.4	6502.78	0	1	PT	1	2	SP	2	11.5	ML	11.5	40	CH	40	42	SW	42	44.5	ML	44.5	45	GWs	45	49	MLs	49
57	CASMEZ	38.8394	16.3003	16.57	-10.43	73	16.5615	1.3815	4.91848	5.47671	2.319	122	120	1.49705e-06	0.000223944	7.59419	0.000227676	7.56268	6.43956	6.31155	101.657	91.2956	7256.16	6692.48	0	27	GW	27	55	GWs	55	62.5	CHs	62.5	94	GWs	94	100	CHs
58	CASMEZ	38.8339	16.3044	27	0	73	16.5201	1.671	5.59858	6.234	2.674	122	120	1.42715e-06	0.000213488	7.64158	0.000217046	7.61005	7.4436	7.3273	89.3084	80.2054	6335.98	5840.77	0	5	PT	5	10	ML	10	20	SW	20	27	SW	27	30	CHs	30	34	GWs	34	38	CHs	38	100	SWs
59	CASMEZ	38.8464	16.3081	12	-14.5	73.5	16.5796	1.478	5.09045	5.6682	2.2275	122	120	1.34409e-06	0.000201063	7.70101	0.000204414	7.66945	6.73154	6.58432	98.2231	88.2114	6839.34	6294.7	0	1	PT	1	9	ML	9	11	SP	11	12	CH	12	13.5	GW	13.5	14	CL	14	24.5	SW	24.5	26.5	CL	26.5
60	CASMEZ	38.8939	16.3173	22	-11	67	16.54	1.308	4.75686	5.29675	2.515	122	120	1.71481e-06	0.000256519	7.4596	0.000260794	7.42815	6.24171	6.13236	105.111	94.3975	7140.46	6557.63	0	2	PT	2	3	SM	3	6	ML	6	9	SM	9	11	ML	11	12	SM	12	18	ML	18	20	SM	20
61	CASMEZ	38.8928	16.3161	22	-11	67	16.54	1.3093	4.75743	5.29739	2.806	122	120	1.91132e-06	0.000285915	7.35207	0.000290681	7.32068	6.32145	6.21092	105.099	94.3862	7150.81	6568.05	0	2	SP	2	2.7	GW	2.7	4	ML	4	5.5	SM	5.5	6	GW	6	7	SM	7	11.5	SP	11.5	15.5	ML	15.5
62	CASMEZ	38.89	16.317	30	-4	66	16.5082	1.916	6.32192	7.03944	2.458	122	120	1.14412e-06	0.000171149	7.86065	0.000174002	7.82901	8.09178	7.97435	79.0899	71.0284	5715.69	5277.14	0	1.5	SP	1.5	4	SM	4	9	SP	9	16	OH	16	24.5	ML	24.5	30	SP	30	34	SP	34	100	SPs
63	CASMEZ	38.8878	16.3173	30	-4	66	16.5082	1.3184	4.76457	5.30533	2.458	122	120	1.66273e-06	0.000248727	7.49017	0.000252873	7.45871	6.25061	6.16211	104.941	94.2448	7122.01	6540.12	0	4	SP	4	6	ML	6	8.2	SW	8.2	9.3	SM	9.3	10.2	ML	10.2	11	SP	11	14.7	CH	14.7	18	ML	18
64	CASMEZ	38.8714	16.3137	16.2	-13.8	70	16.563	1.36	4.83612	5.38501	2.86	122	120	1.87548e-06	0.000280554	7.37083	0.00028523	7.33943	6.51466	6.38467	103.389	92.8504	7074.34	6501.06	0	2	MH	2	3.5	ML	3.5	5	MH	5	10	CH	10	20.5	ML	20.5	30	ML	30	100	MLs
65	CASMEZ	38.8726	16.32	13.2	-18.8	68	16.5749	1.9553	6.39475	7.12053	2.511	122	120	1.1453e-06	0.000171326	7.85963	0.000174181	7.82799	8.24862	8.07046	78.1892	70.2195	5685.09	5251.54	0	1	PT	1	2.5	SM	2.5	5	ML	5	16.5	SM	16.5	18	CH	18	20.5	SP	20.5	23.5	CH	23.5	23.9	SP	23.9
66	CASMEZ	38.9322	16.3293	10	-55	35	16.5875	1.256	4.96899	5.53296	2.143	122	120	1.52166e-06	0.000227626	7.57803	0.00023142	7.54653	5.97411	5.83926	100.624	90.3675	6704.28	6051.98	0	4	PT	4	7	ML	7	17.5	GW	17.5	23.5	ML	23.5	29.5	SM	29.5	51.5	65	SP	65	100	SPs
67	CASMEZ	38.9178	16.3102	40	4	64	16.4686	1.32	4.82392	5.37142	2.112	122	120	1.42694e-06	0.000213456	7.64173	0.000217014	7.61019	6.14167	6.08043	103.65	93.0853	7198.97	6624.24	0	6	ML	6	12	MH	12	15	GP	15	20	SP	20	22	GP	22	23	SP	23	36	GW	36	100	GWs
68	CASMEZ	38.9206	16.3449	25	-32	43	16.5281	0.973	4.18422	4.65911	2.374	122	120	2.17597e-06	0.000325504	7.22355	0.000330929	7.19222	5.00108	4.92105	119.497	107.317	7881.59	7106.94	0	57	SW	57	100	CLs
69	CASMEZ	38.9369	16.3354	93	15	22	16.2584	0.788	3.91713	4.36171	1.776	122	120	2.01003e-06	0.000300681	7.30217	0.000305692	7.2708	4.06531	4.1189	127.645	114.634	8290.81	7588.23	0	40	SC	40	45	GW	45	78	GW	78	100	GWs
70	CASMEZ	38.9283	16.2798	16	-34	50	16.5637	1.0275	4.2356	4.71632	2.5	122	120	2.16992e-06	0.000324599	7.22631	0.000330009	7.19498	5.24711	5.1431	118.047	106.015	7853.8	7088.54	0	22.5	SW	22.5	50	SP	50	100	CHs
71	CASMEZ	38.9397	16.2796	11.62	-61.38	27	16.5811	0.8655	3.9883	4.44096	1.816	122	120	1.87126e-06	0.000279922	7.37306	0.000284588	7.34166	4.45367	4.35735	125.367	112.588	8356.41	7666.37	0	10	GW	10	12	MH	12	15	GW	15	21.5	SW	21.5	28	GW	28	31	SP	31	33	GW	33	34.5	SW	34.5
72	CASMEZ	38.9503	16.2794	119.54	37.54	18	16.1532	0.921	4.00771	4.46257	1.924	122	120	1.86308e-06	0.000278698	7.37741	0.000283343	7.346	4.58992	4.70316	124.76	112.043	7944.57	7257.88	0	3.2	SW	3.2	15.3	GM	15.3	17.5	CH	17.5	22.9	CL	22.9	24.7	GM	24.7	35.1	CL	35.1	42.5	GM	42.5	82	CH	82
73	CASMEZ	38.8203	16.2554	3	-27	70	16.6153	1.339	4.81	5.35592	2.51	122	120	1.67178e-06	0.000250082	7.48478	0.00025425	7.45333	6.37072	6.20819	103.95	93.3546	7158.5	6586.35	0	2	SP	2	8	GW	8	11	SP	11	30	SM	30	100	SMs
74	CASMEZ	38.8219	16.256	3	-24	73	16.6153	2.031	6.58876	7.33656	2.681	122	120	1.17726e-06	0.000176107	7.83235	0.000179042	7.80073	8.53053	8.30968	75.8869	68.1518	5615.49	5197.8	0	6	PT	6	12.5	12.5	23	SM	23	27	SP	27	100	SPs
75	CASMEZ	38.8181	16.2555	4	-29	67	16.6113	1.633	5.56033	6.19141	2.603	122	120	1.42159e-06	0.000212656	7.64545	0.0002162	7.61392	7.34323	7.15767	89.9227	80.7571	6221.49	5638.55	0	6	PT	6	10.6	SW	10.6	18	SM	18	33	SW	33	100	SWs
76	CASMEZ	38.7981	16.2447	8.95	-26.05	65	16.5917	1.6435	5.72226	6.37172	2.252	122	120	1.22204e-06	0.000182805	7.79536	0.000185852	7.76375	7.26054	7.09177	87.3781	78.4718	5956.77	5472.27	0	1	PT	1	15	GP	15	25	SM	25	35	SW	35	44	SWs	44	66.5	GWs	66.5	73	CHs	73	100	SBGs
77	CASMEZ	38.8136	16.2397	3.5	-5	91.5	16.6133	2.013	6.23634	6.94414	2.7625	122	120	1.2239e-06	0.000183083	7.79385	0.000186134	7.76225	8.50408	8.28583	80.1753	72.0031	6009.34	5564.77	0	1.5	PT	1.5	3	SP	3	8.5	SP	8.5	15	SWs	15	27	GPs	27	100	SWs
78	CASMEZ	38.8244	16.2331	21	17	96	16.5439	1.629	5.34115	5.94735	3.213	122	120	1.75904e-06	0.000263135	7.43436	0.000267521	7.40293	7.46508	7.33013	93.6128	84.071	6781.74	6262.66	0	4	PT	4	13.6	GCs	13.6	27	SPs	27	36	CHs	36	40	SCs	40	47	CHs	47	51	SCs	51	100	CHs
79	CASMEZ	38.8236	16.2351	21	17.4	96.4	16.5439	0.9501	4.05502	4.51525	1.9384	122	120	1.81953e-06	0.000272184	7.40085	0.000276721	7.36943	4.8031	4.71788	123.304	110.736	7697.74	7014.03	0	1.2	GP	1.2	3.6	SP	3.6	18.3	CHs	18.3	22.4	CLs	22.4	24.4	SW	24.4	28	SC	28	35	SP	35	39.6	SC	39.6
80	CASMEZ	38.8225	16.268	21	-13.5	65.5	16.5439	1.2299	4.53881	5.05395	2.8582	122	120	2.07257e-06	0.000310036	7.2718	0.000315203	7.24045	6.06064	5.95253	110.161	98.9324	7494.84	6780.7	0	3.6	PT	3.6	16.5	CH	16.5	25.4	CL	25.4	29.3	SC	29.3	34.5	SP	34.5	100	CHs
81	ISPRA	38.9526	16.1565	34	15.5	81.5	16.4924	1.4395	4.83599	5.38486	2.382	122	120	1.47576e-06	0.000220759	7.60839	0.000224439	7.57687	6.62311	6.53994	103.392	92.853	7071.7	6401.45	0	18.5	GC	18.5	27	GCs	27	52	CLs	57	100	GPs
82	ISPRA	38.962	16.2688	150	115	65	16.0324	1.45	5.21018	5.80152	2.352	122	120	1.44662e-06	0.000216401	7.62815	0.000220007	7.59662	6.48278	6.72776	95.9659	86.1843	6677.75	6145.62	0	6	PT	6	30	GP	30	32	CH	32	35	GP	35	74	GPs	74	84	CHs	84	100	TDLs
83	ISPRA	38.9637	16.292	163	111.9	48.9	15.9808	1.441	5.25705	5.8537	2.3457	122	120	1.45176e-06	0.000217169	7.62464	0.000220788	7.59311	6.43422	6.71474	95.1105	85.416	6384.9	5768.34	0	5	PT	5	20	SM	20	51.1	SP	51.1	72	SPs	72	100	SWs
84	ISPRA	38.9639	16.3005	165	115	50	15.9729	1.189	4.64864	5.17625	2.403	122	120	1.80243e-06	0.000269625	7.41021	0.000274119	7.37879	5.62319	5.87449	107.558	96.5951	7117.17	6520.77	0	4	PT	4	50	SW	50	75	SWs	75	94	CHs	94	100	GPs
85	ISPRA	38.9587	16.3032	143	90	47	16.0601	1.207	4.81986	5.3669	2.518	122	120	1.86052e-06	0.000278316	7.37877	0.000282954	7.34736	5.74171	5.94198	103.738	93.1637	8147.71	7475.21	0	65	GM	53	65	GMs	65	95	CLs	95	100	CLs
86	ISPRA	38.9701	16.3215	194	176	82	15.8579	1.588	5.31254	5.91549	2.236	122	120	1.25576e-06	0.00018785	7.76838	0.00019098	7.73678	6.80521	7.19625	94.117	84.5238	6723.96	6202.09	0	18	GW	18	90	GWs	90	100	SFs
87	ISPRA	38.9628	16.3257	163	140.8	77.8	15.9808	1.3198	4.75729	5.29723	3.0752	122	120	2.07803e-06	0.000310852	7.26919	0.000316033	7.23784	6.2282	6.50086	105.102	94.389	7422.64	6741.3	0	20	SW	20	22.2	CH	20	59	CHs	59	100	CHs
88	ISPRA	38.9623	16.3246	145	135.8	90.8	16.0522	2.0072	6.24955	6.95886	2.1584	122	120	9.59019e-07	0.00014346	8.03556	0.000145851	8.00384	8.04135	8.32457	80.0058	71.8509	4869.57	4350.92	0	9.2	GW	9.2	16	GWs	16	100	SFs
89	ISPRA	38.9614	16.3254	150	131	81	16.0324	1.689	5.55983	6.19085	2.563	122	120	1.35333e-06	0.000202445	7.69422	0.000205819	7.66266	7.26947	7.54326	89.9308	80.7643	6464.6	5881.61	0	10	GP	10	19	GM	19	40	GMs	40	85	SWs	85	95	CHs	95	100	SFs
90	ISPRA	38.962	16.3263	168	137	69	15.961	1.335	4.80193	5.34694	2.78	122	120	1.85716e-06	0.000277813	7.38056	0.000282443	7.34916	6.20235	6.48748	104.125	93.5115	7105.19	6527.83	0	4	PT	4	31	SP	31	35	SPs	35	61	SMs	61	67	CHs	67	80	MLs	80	100	CHs
91	ISPRA	38.9587	16.3252	143	90	47	16.0601	1.061	4.40879	4.90918	2.268	122	120	1.9064e-06	0.000285178	7.35463	0.000289931	7.32323	5.1678	5.34849	113.41	101.85	7928.86	7193.67	0	10	PT	10	30	GP	30	50	SP	50	53	GC	50	100	GCs
92	ISPRA	38.955	16.3396	122	82.3	60.3	16.1434	1.5026	5.30714	5.90948	2.5104	122	120	1.49e-06	0.000222889	7.59887	0.000226604	7.56736	6.73308	6.904	94.2127	84.6098	6587.13	6064.73	0	5	PT	5	15	SC	15	27	SM	27	38	GP	38	39.7	ML	39.7	43	MLs	43	100	SWs
93	ISPRA	38.9425	16.3325	102	73.6	71.6	16.2227	1.8184	6.08222	6.77253	2.5428	122	120	1.24712e-06	0.000186557	7.77522	0.000189666	7.74362	7.71751	7.84441	82.2068	73.8276	6152.05	5696.22	0	5	PT	5	28.4	GP	28.4	48	GPs	48	100	SPs
94	ISPRA	38.9498	16.2832	104	64	60	16.2148	1.798	6.07046	6.75944	2.402	122	120	1.19143e-06	0.000178226	7.82049	0.000181197	7.78888	7.61274	7.74454	82.366	73.9706	5838.71	5382	0	1	PT	1	40	SP	40	100	SPs
95	ISPRA	38.9438	16.3004	98	56.8	58.8	16.2386	1.1616	4.50101	5.01186	2.7904	122	120	2.14238e-06	0.000320478	7.23897	0.00032582	7.20763	5.70662	5.79321	111.086	99.7633	7390.05	6774.09	0	6	PT	6	41.2	ML	41.2	62	MLs	62	100	CLs
96	ISPRA	38.9334	16.296	72	57	85	16.3417	1.694	5.53192	6.15978	2.977	122	120	1.5673e-06	0.000234452	7.54874	0.00023836	7.51726	7.52272	7.54955	90.3845	81.1717	6504.92	6003.74	0	1	PT	1	15	SW	15	50	SWs	50	100	MLs
97	ISPRA	38.9241	16.3013	60	27.5	67.5	16.3893	1.4625	5.09576	5.67412	2.4775	122	120	1.51079e-06	0.000225999	7.58514	0.000229766	7.55363	6.6874	6.67742	98.1207	88.1194	6764.77	6220.7	0	12	OH	12	32.5	SC	32.5	88	SCs	88	100	SPs
98	ISPRA	38.9139	16.2939	43	32.5	89.5	16.4567	2.248	6.93673	7.72403	2.7635	122	120	1.09635e-06	0.000164003	7.90292	0.000166737	7.87126	9.06197	8.97919	72.08	64.733	5628.75	5229.08	0	8.5	GC	8.5	10.5	SM	10.5	27	SMs	27	43	SPs	43	100	SPs
99	ISPRA	38.897	16.2813	27	25.9	98.9	16.5201	1.7216	5.58871	6.22301	2.8582	122	120	1.48063e-06	0.000221488	7.60512	0.000225179	7.57361	7.64771	7.52813	89.466	80.3469	6691.84	6111.86	0	5	PT	1.1	5	PTs	5	29	MLs	29	100	GPs
100	ISPRA	38.9201	16.2693	37	31.4	94.4	16.4805	1.9656	6.14205	6.83915	2.8492	122	120	1.29275e-06	0.000193382	7.73961	0.000196605	7.70803	8.33647	8.24028	81.4061	73.1085	6102.97	5651.58	0	1	SP	1	5.6	CL	5.6	7	CLs	7	10	MLs	10	22	SPs	22	29	SWs	29	40	SPs	40	42	SWs	42
101	ISPRA	38.9081	16.2421	9	7	98	16.5915	2.457	7.41249	8.25378	2.918	122	120	1.05917e-06	0.000158442	7.93711	0.000161082	7.90544	9.70821	9.47959	67.4537	60.5783	5377.08	5003.06	0	2	PT	2	13	SMs	13	100	SPs
102	ISPRA	38.9343	16.3688	132	111	79	16.1037	1.405	4.90131	5.45759	2.727	122	120	1.73099e-06	0.000258939	7.45029	0.000263255	7.41885	6.46686	6.66013	102.014	91.6155	7100.86	6439.55	0	5	PT	5	21	ML	21	35	MLs	35	46	CLs	46	73	SCs	73	100	GCs
103	ISPRA	38.9265	16.3646	87	86.2	99.2	16.2822	1.9178	5.95143	6.6269	2.9356	122	120	1.36515e-06	0.000204213	7.6856	0.000207616	7.65405	8.13739	8.21805	84.0134	75.45	6288.97	5823.12	0	0.8	CL	0.8	25	CLs	25	30	SPs	30	56	SWs	56	65	SMs	65	72	SWs	72	80	SMs	80	95	GPs	95
104	ISPRA	38.8662	16.2549	10	-10	80	16.5875	1.42	4.90695	5.46387	2.545	122	120	1.5984e-06	0.000239105	7.52927	0.00024309	7.49779	6.64008	6.48979	101.896	91.5102	7102.61	6442.05	0	2.5	PT	2.5	20	SP	20	45	MLs	45	100	GCs
105	ISPRA	38.8714	16.2835	35	23.1	88.1	16.4884	1.577	5.23773	5.8322	2.8703	122	120	1.62324e-06	0.00024282	7.51399	0.000246867	7.48252	7.19431	7.10678	95.4612	85.731	6809.61	6280.29	0	11.9	SP	11.9	20	SPs	20	35	GPs	35	60	SCs	60	100	CHs
106	ISPRA	38.8773	16.2849	24	21.8	97.8	16.532	1.5516	5.11292	5.69322	3.2304	122	120	1.85679e-06	0.000277757	7.38076	0.000282387	7.34935	7.22071	7.09967	97.7914	87.8237	7025.61	6483.37	0	2.2	ML	2.2	8	MLs	8	10	SPs	10	18	GPs	18	20	SMs	20	36	CHs	36	38	SMs	38	56	CHs	56
107	ISPRA	38.8803	16.2829	24	22.5	98.5	16.532	1.617	5.24521	5.84053	3.2055	122	120	1.76796e-06	0.000264469	7.42935	0.000268877	7.39792	7.42106	7.29633	95.325	85.6087	6897.88	6369.31	0	1.5	SP	3	SPs	3	7	SWs	7	13	MLs	13	20	GCs	20	33	CHs	33	40	GCs	40	46	CLs	46	100
108	ISPRA	38.8809	16.2868	24	21.9	97.9	16.532	1.752	5.56637	6.19814	3.2077	122	120	1.63285e-06	0.000244258	7.50814	0.000248329	7.47667	7.8349	7.70259	89.8252	80.6694	6593.17	6095.1	0	2.1	SP	2.1	3	SPs	3	5	CLs	5	18	SWs	18	22	MLs	22	35	SWs	35	37	GPs	37	100	CLs
109	ISPRA	38.8873	16.316	45	43.5	98.5	16.4487	1.5995	5.22271	5.81547	3.3005	122	120	1.84027e-06	0.000275286	7.38962	0.000279874	7.35821	7.35574	7.29767	95.7358	85.9776	6920.23	6389.38	0	1.5	SW	1.5	14	SWs	14	27	CLs	27	29	SWs	29	94	CHs	94	100	CHs
110	ISPRA	38.9103	16.3621	125	110	85	16.1315	1.659	5.51486	6.14078	2.92	122	120	1.56972e-06	0.000234815	7.54721	0.000238728	7.51573	7.31729	7.5123	90.6642	81.4229	6520.13	6017.41	0	15	SM	15	32	SMs	32	60	CHs	60	85	SPs	85	100	CHs
111	ISPRA	38.87	16.3471	100	94	94	16.2306	1.604	5.29206	5.89269	3.192	122	120	1.77478e-06	0.00026549	7.42553	0.000269914	7.3941	7.25714	7.37154	94.4812	84.8509	6637.8	6025.32	0	6	CH	6	90	CHs	90	100	SBGs
112	ISPRA	38.8842	16.4013	235	175	40	15.6953	0.975	4.17307	4.6467	2.22	122	120	2.03065e-06	0.000303765	7.29205	0.000308827	7.26069	4.74621	5.11036	119.816	107.603	7691.98	7027.61	0	30	SP	30	55	SM	55	60	SC	60	80	SCs	80	100	CHs
113	ISPRA	38.8917	16.3882	225	153	28	15.735	0.9	4.05347	4.51353	2.094	122	120	2.07501e-06	0.000310401	7.27063	0.000315574	7.23928	4.45139	4.77261	123.351	110.778	7773.89	7089.92	0	72	SP					74	95	CLs	95	100	CLs
114	ISPRA	38.9059	16.4007	85	73	88	16.2901	1.547	5.14991	5.73441	2.734	122	120	1.57614e-06	0.000235775	7.54317	0.000239704	7.51168	6.98803	7.05261	97.0891	87.1929	6897.25	6358.9	0	12	SM	12	19	SMs	19	40	GPs	40	48	CLs	48	89	SMs	89	100	CHs
115	ISPRA	38.9131	16.3991	100	89.4	89.4	16.2306	2.1508	6.67849	7.43647	2.8062	122	120	1.1636e-06	0.000174063	7.84392	0.000176964	7.81229	8.71105	8.84545	74.8673	67.2362	5701.26	5286.13	0	2	PT	2	10.6	SM	10.6	20	SMs	20	55	SWs	55	100	SPs
116	ISPRA	38.9139	16.3999	100	79.6	79.6	16.2306	1.8532	5.96897	6.64643	2.6348	122	120	1.26798e-06	0.000189677	7.75878	0.000192838	7.7272	7.84733	7.96946	83.7666	75.2284	6095.22	5630.74	0	20	SM	20	20.4	SW	20.4	100	SWs
117	ISPRA	38.9137	16.3974	125	105	80	16.1315	1.855	5.96957	6.6471	2.64	122	120	1.26925e-06	0.000189867	7.75779	0.000193031	7.7262	7.81126	8.01833	83.7581	75.2208	6098.44	5634.01	0	20	SM	20	21	SMs	21	100	SWs
118	ISPRA	38.9173	16.3949	170	129	59	15.9531	1.503	5.31113	5.91393	2.367	122	120	1.40451e-06	0.000210101	7.65743	0.000213603	7.62589	6.62299	6.93227	94.1419	84.5462	6470.12	5948.11	0	40	SM	40	41	SW	41	100	SWs
119	ISPRA	38.8466	16.3232	186	163.7	77.7	15.8896	2.2018	7.08123	7.88493	2.2216	122	120	8.99858e-07	0.00013461	8.09866	0.000136853	8.06691	8.49401	8.9485	70.6092	63.4121	4463.74	4006.01	0	7	CL	7	22.3	GP	22.3	37	GPs	37	100	SBGs
120	ISPRA	38.8389	16.246	18	11	93	16.5558	1.678	5.40932	6.02326	2.57	122	120	1.36593e-06	0.000204329	7.68504	0.000207735	7.65348	7.44923	7.30449	92.4331	83.0116	6620.35	6021.14	0	3	PT	3	7	ML	7	11	ML	11	23	CLs	23	100	GPs
121	ISPRA	38.8384	16.2455	17	10	93	16.5598	1.685	5.42469	6.04037	2.54	122	120	1.34437e-06	0.000201105	7.7008	0.000204457	7.66924	7.46319	7.31498	92.1712	82.7764	6603.69	6006.18	0	3	PT	3	7	ML	7	12	MLs	12	20	CLs	20	55	GPs	55	100	GPs
122	ISPRA	38.8372	16.2375	10	2.1	92.1	16.5875	1.6169	5.26855	5.86652	2.7308	122	120	1.50623e-06	0.000225318	7.58813	0.000229073	7.55662	7.32008	7.15365	94.9027	85.2294	6823.41	6208.19	0	2	PT	2	7.9	GM	7.9	15	GMs	15	44	CLs	44	50	CHs	50	100	GPs
123	ISPRA	38.8292	16.3441	605	555	50	14.2281	2.4675	7.76082	8.64165	2.267	122	120	8.1937e-07	0.00012257	8.19153	0.000124613	8.15973	8.30858	10.4872	64.4262	57.8594	3737.51	3319.85	0	0.5	PT	0.5	18	SW	18	50	SBG	50	100	SBGs
124	ISPRA	38.8251	16.3674	620	611.5	91.5	14.1686	2.577	7.94388	8.84549	2.4895	122	120	8.61556e-07	0.00012888	8.14177	0.000131028	8.11	8.57875	10.8989	62.9415	56.526	3730.48	3322.45	0	5	PT	5	8.5	SM	8.5	18	SMs	18	100	SBGs
125	ISPRA	38.8065	16.3139	580	560	80	14.3272	2.586	7.9991	8.90698	2.332	122	120	8.04241e-07	0.000120306	8.21	0.000122312	8.1782	8.63283	10.7782	62.507	56.1358	3713.85	3308.64	0	2	PT	2	14	GM	14	20	SBG	20	100	SBGs
126	ISPRA	38.8056	16.3766	710	705	95	13.8117	2.5	7.67216	8.54293	2.36	122	120	8.41895e-07	0.000125939	8.16465	0.000128038	8.13287	8.1919	10.8249	65.1707	58.5279	4096.85	3674.38	0	5	GP	5	30	GPs	30	100	SBGs
127	ISPRA	38.7823	16.3452	700	660.5	60.5	13.8513	2.24	7.19811	8.01507	2.16	122	120	8.59987e-07	0.000128646	8.14358	0.00013079	8.11181	7.59189	9.98908	69.4627	62.3825	4369.83	3919.52	0	30	GM	30	39.5	SBG	39.5	100	SBGs
128	ISPRA	38.7795	16.3405	635	575	40	14.1091	2.54	7.91991	8.8188	2.28	122	120	8.00547e-07	0.000119754	8.21456	0.00012175	8.18276	8.40505	10.7482	63.132	56.6971	3646.2	3236.93	0	15	SM	15	60	SBG	60	100	SBGs
129	ISPRA	38.7906	16.2954	570	540	70	14.3669	2.8375	8.57801	9.55159	2.435	122	120	7.6533e-07	0.000114486	8.25915	0.000116394	8.22732	9.20217	11.4382	58.2885	52.3473	3300.65	2922.79	0	2.5	PT	2.5	30	SBG	30	100	SBGs
130	ISPRA	38.8217	16.2446	25	7	82	16.5281	1.365	4.79979	5.34455	2.806	122	120	1.83333e-06	0.000274248	7.39336	0.000278819	7.36195	6.50568	6.3999	104.171	93.5532	7282.51	6704.89	0	8	ML	8	12	SP	12	18	GP	18	28	GPs	28	45	GCs	45	100	CHs
131	ISPRA	38.8212	16.2446	22	5	83	16.54	1.586	5.2675	5.86535	2.269	122	120	1.2759e-06	0.000190862	7.75261	0.000194043	7.72102	7.06947	6.94413	94.9217	85.2464	6686.62	6071.27	0	6	ML	6	9	SP	9	17	SW	17	18	SWs	18	100	GPs
132	ISPRA	38.8078	16.2357	25	-40	35	16.5281	1.908	6.56502	7.31013	2.08	122	120	9.72234e-07	0.000145437	8.022	0.000147861	7.99028	7.9495	7.81707	76.1612	68.3982	4844.25	4350.53	0	8	SM	8	40	GW	40	65	SBG	65	100	SBGs
133	ISPRA	38.8073	16.2502	140	110	70	16.072	2.553	7.9348	8.83537	2.302	122	120	8.04156e-07	0.000120294	8.21011	0.000122299	8.1783	9.46763	9.77794	63.0136	56.5907	3638.66	3230.17	0	1	PT	1	15	SP	15	30	SBG	30	100	SBGs
134	ISPRA	38.8034	16.2441	200	no	0	15.8341	2.775	8.44326	9.40154	2.47	122	120	7.93816e-07	0.000118747	8.22293	0.000120726	8.19112	9.90235	10.4929	59.2188	53.1828	3367.32	2983.42	0	5	PT	5	100	SBG
135	ISPRA	38.802	16.2435	190	170	80	15.8737	2.7	8.28155	9.22148	2.336	122	120	7.71605e-07	0.000115425	8.25106	0.000117348	8.21923	9.71098	10.2462	60.3752	54.2212	3523.46	3132.07	0	8	GP	8	20	SBG	20	100	SBGs
136	ISPRA	38.7984	16.2207	10	4	94	16.5875	1.705	5.45809	6.07757	2.437	122	120	1.27473e-06	0.000190687	7.75352	0.000193865	7.72194	7.50357	7.33235	91.6071	82.2698	6577.01	5983.16	0	6	SM	6	23	SMs	23	42	GWs	42	100	GPs
137	ISPRA	38.7947	16.2305	55	-5	40	16.4091	2.025	6.82617	7.60092	2.186	122	120	9.62745e-07	0.000144017	8.03172	0.000146417	8	8.25856	8.22573	73.2475	65.7815	4643.94	4169.1	0	3	PT	3	35	GP	35	60	SBG	60	100	SBGs
138	ISPRA	38.7942	16.2302	94	44	50	16.2544	2.7545	8.39406	9.34676	2.385	122	120	7.72203e-07	0.000115514	8.25029	0.000117439	8.21846	10.0595	10.1856	59.5659	53.4945	3392.39	3006.25	0	1.5	PT	1.5	6	SW	6	50	SBG	50	100	SBGs
139	ISPRA	38.7923	16.2329	180	110	30	15.9134	2.65	8.17374	9.10144	2.54	122	120	8.54818e-07	0.000127872	8.14955	0.000130004	8.11778	9.68904	10.1796	61.1715	54.9364	3506.51	3109.95	0	10	PT	10	70	SBG	70	100	SBGs
140	ISPRA	38.7653	16.2071	112	no	0	16.1831	2.732	8.34277	9.28965	2.344	122	120	7.65179e-07	0.000114463	8.25935	0.000116371	8.22752	9.95465	10.1576	59.9321	53.8233	3418.68	3030.16	0	7	SM	7	100	SBG
141	ISPRA	38.7648	16.2155	50	no	0	16.4289	2.8125	8.52411	9.49157	2.449	122	120	7.76573e-07	0.000116168	8.2447	0.000118104	8.21288	10.3103	10.2442	58.6571	52.6783	3327.09	2946.84	0	3.5	PT	3.5	100	SBG
142	ISPRA	38.7664	16.2179	15	5	90	16.5677	1.638	5.33871	5.94464	2.664	122	120	1.45046e-06	0.000216975	7.62552	0.000220591	7.594	7.3588	7.20679	93.6555	84.1094	6670.49	6063.36	0	2	PT	2	10	ML	10	40	MLs	40	100	GPs
143	ISPRA	38.7717	16.2218	20	-40	40	16.5479	2.372	7.54991	8.4068	2.224	122	120	8.36192e-07	0.000125086	8.17139	0.000127171	8.1396	9.24349	9.06828	66.226	59.4757	3863.97	3434.65	0	10	ML	10	22	SM	22	60	SBG	60	100	SBGs
144	ISPRA	38.7743	16.2274	127	62	35	16.1236	2.735	8.33411	9.28	2.34	122	120	7.63035e-07	0.000114143	8.26213	0.000116045	8.2303	9.92742	10.1951	59.9944	53.8793	3493.15	3104.22	0	7.5	GC	7.5	65	SBG	65	100	SBGs
145	ISPRA	38.7728	16.2274	101	41	40	16.2267	2.65	8.17374	9.10144	2.54	122	120	8.54818e-07	0.000127872	8.14955	0.000130004	8.11778	9.85848	10.0126	61.1715	54.9364	3506.51	3109.95	0	10	PT	10	60	SBG	60	100	SBGs
146	ISPRA	38.772	16.2291	116	26	10	16.1672	1.972	6.63526	7.38835	2.168	122	120	9.80479e-07	0.00014667	8.01363	0.000149115	7.98192	8.0008	8.18036	75.3549	67.6741	4498.57	4010.08	0	4	PT	4	40	SP	40	90	SBG	90	100	SBGs
147	ISPRA	38.7714	16.2329	190	110	20	15.8737	0.85	3.93317	4.37958	1.87	122	120	1.96204e-06	0.000293502	7.32611	0.000298394	7.29473	4.2407	4.47894	127.124	114.166	8707.07	7882.97	0	5	PT	5	20	SP	20	80	GC	80	100	GCs
148	ISPRA	38.7674	16.2332	183	no	0	15.9015	2.68	8.20788	9.13945	2.32	122	120	7.72039e-07	0.000115489	8.2505	0.000117414	8.21868	9.67536	10.1781	60.917	54.7079	3582.32	3187.42	0	10	GC	10	100	SBG
149	ISPRA	38.771	16.2385	240	225	85	15.6755	2.712	8.29465	9.23607	2.38	122	120	7.8266e-07	0.000117078	8.23696	0.00011903	8.20514	9.64512	10.3976	60.2798	54.1356	3443.8	3053.02	0	2	PT	2	8	SP	8	15	SBG	15	100	SBGs
150	ISPRA	38.7698	16.2466	235	165	30	15.6953	1.281	5.0701	5.64554	1.883	122	120	1.31095e-06	0.000196106	7.72575	0.000199374	7.69418	5.68924	6.1239	98.6174	88.5655	6092.47	5453.17	0	1.5	PT	1.5	70	SP	70	72	SPs	72	100	SBGs
151	ISPRA	38.7548	16.2263	18	2.5	84.5	16.5558	2.9	8.71277	9.70165	2.4	122	120	7.38073e-07	0.000110408	8.29509	0.000112249	8.26325	10.5605	10.3495	57.387	51.5377	3235.81	2863.79	0	15.5	SBG	15.5	100	SBGs
152	ISPRA	38.7548	16.2552	130	no	0	16.1117	0.685	3.64683	4.06073	1.71	122	120	2.22634e-06	0.000333039	7.20087	0.000338589	7.16955	3.60587	3.71221	137.105	123.13	8264.54	7504.3	0	5	PT	5	100	CL
153	ISPRA	38.7589	16.2496	120	55	35	16.1513	0.906	3.05196	3.39835	1.174	122	120	1.15565e-06	0.000172874	7.85072	0.000175755	7.81908	4.28646	4.39238	163.829	147.13	7773.53	6711.48	0	5	PT	56	65	GW	65	80	GWs	80	100	SBGs
154	ISPRA	38.7612	16.2616	211	131	20	15.7905	1.855	6.37448	7.09797	2.15	122	120	1.03367e-06	0.000154626	7.96127	0.000157203	7.92959	7.51281	8.00144	78.4377	70.4427	4709.64	4201.15	0	5	PT	5	45	SP	45	80	SBG	80	100	SBGs
155	ISPRA	38.762	16.2647	260	200	40	15.5962	2.66	8.1842	9.11308	2.32	122	120	7.77844e-07	0.000116358	8.24308	0.000118297	8.21126	9.46588	10.2925	61.0933	54.8662	3501.54	3105.49	0	10	SW	10	60	SBG	60	100	SBGs
156	ISPRA	38.7598	16.2735	230	219	89	15.7151	2.9	8.71277	9.70165	2.4	122	120	7.38073e-07	0.000110408	8.29509	0.000112249	8.26325	10.082	10.8212	57.387	51.5377	3235.81	2863.79	0	11	SBG	11	100	SBGs
157	ISPRA	38.7645	16.276	360	no	0	15.1996	2.035	6.78387	7.55382	2.258	122	120	9.89568e-07	0.00014803	8.00448	0.000150497	7.97278	7.76484	8.81639	73.7042	66.1917	4384.59	3906.79	0	7	PT	7	37	SP	37	100	SBG
158	ISPRA	38.7769	16.2779	315	285	70	15.3781	2.705	8.28678	9.2273	2.402	122	120	7.91939e-07	0.000118466	8.22528	0.000120441	8.19347	9.47502	10.5489	60.3371	54.187	3447.44	3056.3	0	3	PT	3	8	SM	8	30	SBG	30	100	SBGs
159	ISPRA	38.7756	16.276	329	299	70	15.3225	2.8	8.49716	9.46156	2.456	122	120	7.82269e-07	0.00011702	8.23745	0.00011897	8.20564	9.66704	10.8274	58.8432	52.8454	3340.43	2958.97	0	4	PT	4	30	SBG	30	100	SBGs
160	ISPRA	38.7742	16.2666	230	175	45	15.7151	1.578	5.85869	6.52363	2.325	122	120	1.31402e-06	0.000196564	7.72343	0.00019984	7.69186	6.74804	7.24707	85.3433	76.6444	5981.84	5428.59	0	22	SM	22	30	SP	30	45	SW	45	55	SM	45	70	SMs	70	100	SBGs
161	ISPRA	38.7847	16.2464	300	240	40	15.4375	2.85	8.60497	9.5816	2.428	122	120	7.59783e-07	0.000113656	8.26636	0.00011555	8.23453	9.8283	10.8713	58.106	52.1833	3287.54	2910.86	0	2	PT	2	60	SBG	60	100	SBGs
162	ISPRA	38.7831	16.2496	199	119	20	15.8381	2.57	7.95544	8.85836	2.28	122	120	7.91202e-07	0.000118356	8.2262	0.000120329	8.19439	9.37652	9.93205	62.8501	56.4439	3766.26	3358.83	0	15	GM	15	50	SBG	50	80	SBG	80	100	SBGs
163	ISPRA	38.782	16.2535	277	227	50	15.5287	2.562	7.97068	8.87533	2.332	122	120	8.11774e-07	0.000121433	8.20076	0.000123457	8.16896	9.2138	10.0923	62.7299	56.336	3617.62	3210.97	0	2	PT	2	14	SM	14	50	SBG	50	100	SBGs
164	ISPRA	38.7831	16.2599	325	230	5	15.3384	2.875	8.65887	9.64162	2.414	122	120	7.48834e-07	0.000112018	8.28075	0.000113885	8.24891	9.82018	10.9797	57.7443	51.8585	3261.53	2887.2	0	1	PT	1	9	SBG	9	95	SBG	95	100	SBGs
165	ISPRA	38.7859	16.2643	347	276	29	15.2512	2.85	8.60497	9.5816	2.395	122	120	7.49457e-07	0.000112111	8.27992	0.00011398	8.24808	9.71213	10.9623	58.106	52.1833	3301.34	2924.66	0	0.5	PT	0.5	2	GP	2	71	SBG	71	100	SBGs
166	ISPRA	38.7934	16.2643	360	270	10	15.1996	2.089	6.89604	7.67872	2.186	122	120	9.33249e-07	0.000139605	8.06255	0.000141932	8.03082	7.87697	8.94341	72.5053	65.115	4302.34	3832.31	0	3	PT	3	35	SP	35	90	SBG	90	100	SBGs
167	ISPRA	38.7928	16.2682	402	332	30	15.0331	2.474	7.76835	8.65004	2.3	122	120	8.29114e-07	0.000124027	8.17981	0.000126094	8.14802	8.74645	10.1105	64.3637	57.8032	3733.53	3316.28	0	2	PT	2	10	ML	10	18	SP	18	70	SBG	70	100	SBGs
168	ISPRA	38.792	16.2688	265	205	40	15.5763	2.4185	7.65406	8.52277	2.273	122	120	8.38184e-07	0.000125384	8.16903	0.000127474	8.13725	8.88635	9.68405	65.3248	58.6664	3800.66	3377.18	0	1.5	PT	1.5	6	SM	6	20	SW	20	60	SBG	60	100	SBGs
169	ISPRA	38.7901	16.2727	350	310	60	15.2393	1.935	6.59325	7.34156	2.19	122	120	1.00937e-06	0.000150991	7.98485	0.000153508	7.95315	7.50353	8.48342	75.8351	68.1054	4529.11	4037.5	0	5	PT	5	40	SW	40	100	SBGs
170	ISPRA	38.7912	16.2741	325	308.5	83.5	15.3384	2.724	8.30886	9.25189	2.336	122	120	7.64807e-07	0.000114408	8.25983	0.000116314	8.228	9.47219	10.5911	60.1767	54.043	3437.24	3047.13	0	8	CL	8	100	SBGs
171	ISPRA	38.7928	16.2741	360	330	70	15.1996	2.0677	6.81856	7.59245	2.2219	122	120	9.58347e-07	0.000143359	8.03625	0.000145749	8.00453	7.83556	8.89651	73.3293	65.8549	4453.2	3977.83	0	0.7	PT	0.7	30	SM	30	39.3	SMs	39.3	100	SBGs
172	ISPRA	38.7942	16.2727	350	300	50	15.2393	1.725	6.00997	6.69208	2.185	122	120	1.12966e-06	0.000168986	7.87326	0.000171803	7.84161	6.93933	7.8464	83.1951	74.7152	5210.21	4670.89	0	5	PT	5	35	CL	35	50	SP	50	65	SPs	65	100	SBGs
173	ISPRA	38.7974	16.2707	342	313	71	15.271	2.144	6.96419	7.75461	2.353	122	120	9.78775e-07	0.000146415	8.01535	0.000148855	7.98364	8.1013	9.127	71.7959	64.4778	4474.82	4009.39	0	5	PT	5	20	GM	20	29	SP	29	30	SPs	30	37	CLs	37	100	SBGs
174	ISPRA	38.802	16.2743	305	250	45	15.4177	1.265	4.86406	5.41611	2.185	122	120	1.54045e-06	0.000230436	7.56587	0.000234276	7.53437	5.63876	6.25533	102.795	92.3171	6810.92	6245.13	0	5	ML	5	55	SW	55	100	SWs
175	ISPRA	38.8059	16.2749	370	330	60	15.16	2.85	8.60497	9.5816	2.428	122	120	7.59783e-07	0.000113656	8.26636	0.00011555	8.23453	9.67184	11.0256	58.106	52.1833	3287.54	2910.86	0	2	PT	2	40	SBG	40	100	SBGs
176	ISPRA	38.8101	16.2752	210	185	75	15.7944	2.658	8.18211	9.11075	2.364	122	120	7.93192e-07	0.000118654	8.22371	0.000120631	8.1919	9.58345	10.199	61.109	54.8802	3502.53	3106.38	0	2	PT	2	10	SW	10	25	SBG	25	100	SBGs
177	ISPRA	38.8081	16.2793	250	196.5	46.5	15.6358	2.67	8.19558	9.12575	2.32	122	120	7.7493e-07	0.000115922	8.2468	0.000117854	8.21497	9.50951	10.2956	61.0085	54.79	3496.14	3100.64	0	10	SC	10	53.5	SBG	53.5	100	SBGs
178	ISPRA	38.7662	16.2924	345	315	70	15.2591	1.863	6.13342	6.82955	2.554	122	120	1.22263e-06	0.000182893	7.79488	0.000185941	7.76327	7.43275	8.38595	81.5206	73.2113	5884.72	5432.69	0	2	PT	2	15	SM	15	30	SP	30	70	SPs	70	100	SWs
179	ISPRA	38.7354	16.3004	353	303	50	15.2274	1.2725	4.76986	5.31122	2.455	122	120	1.7206e-06	0.000257385	7.45626	0.000261674	7.42481	5.67228	6.42408	104.825	94.1402	6846.47	6265.23	0	2.5	PT	2.5	50	CL	50	90	CLs	90	100	SBGs
180	ISPRA	38.7409	16.2571	150	94	44	16.0324	1.2635	4.8511	5.40169	2.216	122	120	1.56416e-06	0.000233983	7.55073	0.000237882	7.51924	5.84169	6.06311	103.069	92.5636	6869.01	6200.85	0	2	PT	2	4.5	GP	4.5	14.5	CL	14.5	56	SW	56	100	SWs
181	ISPRA	38.7334	16.2463	87	-3	10	16.2822	1.01	4.24206	4.72352	1.796	122	120	1.58588e-06	0.000237232	7.53706	0.000241186	7.50558	4.91296	4.96389	117.867	105.853	7309.98	6656.42	0	3	PT	3	75	CH	75	90	SP	90	100	SPs
182	ISPRA	38.7376	16.2316	49	-21	30	16.4329	1.055	4.22015	4.69913	2.25	122	120	1.90202e-06	0.000284524	7.3569	0.000289266	7.32551	5.24781	5.21675	118.479	106.403	7527.26	6870.31	0	5	PT	5	70	CH	70	100	CHs
183	ISPRA	38.9603	16.1913	212	192	80	15.7865	1.52	5.16722	5.75368	2.24	122	120	1.31429e-06	0.000196604	7.72323	0.000199881	7.69166	6.57572	7.00781	96.7639	86.9009	6989.96	6453.41	0	20	GP	20	100	GWs
184	ISPRA	38.9628	16.191	285	257	72	15.497	1.436	5.01202	5.58087	2.176	122	120	1.35142e-06	0.000202159	7.69562	0.000205528	7.66406	6.19688	6.81479	99.7602	89.5918	6893.15	6246.44	0	28	SW	28	100	GWs
185	ISPRA	38.9623	16.1793	181	166	85	15.9094	1.747	5.69229	6.33834	2.765	122	120	1.41152e-06	0.00021115	7.65249	0.000214669	7.62096	7.44422	7.82792	87.8382	78.885	6392.51	5823.08	0	15	GP	15	24	GPs	24	45	CHs	45	100	SWs
186	ISPRA	38.9526	16.1565	34	15.5	81.5	16.4924	1.5295	5.11741	5.69822	2.502	122	120	1.45889e-06	0.000218236	7.61978	0.000221873	7.58826	6.94539	6.85787	97.7057	87.7467	7041.19	6499.42	0	18.5	GC	18.5	27	GCs	27	52	CLs	52	100	GWs
187	ISPRA	38.9714	16.1552	18	6	88	16.5558	1.489	5.00162	5.56929	2.996	122	120	1.79446e-06	0.000268433	7.4146	0.000272907	7.38318	6.97178	6.83742	99.9675	89.778	7154.73	6506.68	0	1	PT	1	12	GM	12	33	GMs	33	100	CLs
188	ISPRA	38.9706	16.1666	170	139	69	15.9531	1.4785	5.10046	5.67935	2.305	122	120	1.39039e-06	0.000207988	7.66745	0.000211455	7.6359	6.52923	6.83419	98.0304	88.0383	6699.85	6156.28	0	1.5	PT	1.5	20	GC	20	31	SP	31	54	GPs	54	67	CLs	67	70	CHs	70	75	GPs	75	80	GMs	80
189	ISPRA	38.9689	16.1668	125	109	84	16.1315	1.801	5.82399	6.48499	2.472	122	120	1.22411e-06	0.000183115	7.79368	0.000186167	7.76207	7.60798	7.80975	85.8518	77.1011	5335.18	4778.63	0	15	PT	15	16	GC	16	35	GCs	35	100	SFs
190	ISPRA	38.9842	16.1488	80	62	82	16.31	1.565	5.19649	5.78628	2.448	122	120	1.39503e-06	0.000208683	7.66414	0.000212161	7.6326	6.97148	7.02054	96.2187	86.4113	6759.91	6136.16	0	1	PT	1	18	CL	18	35	CLs	35	100	GPs
191	ISPRA	38.9931	16.1384	16	-2	82	16.5637	1.3635	4.76403	5.30473	3.109	122	120	2.03353e-06	0.000304197	7.29064	0.000309267	7.25928	6.58669	6.45486	104.953	94.2555	7467.23	6786.85	0	1.5	PT	1.5	18	GM	18	30	CLs	30	100	CHs
192	ISPRA	38.9962	16.1582	403	373	70	15.0291	1.38	4.93663	5.49692	2.16	122	120	1.39592e-06	0.000208816	7.66351	0.000212296	7.63197	5.85916	6.77953	101.284	90.9601	7235.84	6674.23	0	30	GP	30	100	GPs
193	ISPRA	39.0173	16.1682	668	638	70	13.9782	2.002	6.25765	6.96787	2.134	122	120	9.5064e-07	0.000142206	8.04426	0.000144577	8.01253	7.09761	9.20994	79.9023	71.758	4801.98	4284.01	0	11	GP	11	30	SFs	30	100	SFs
194	ISPRA	39.0395	16.1199	20	9.6	89.6	16.5479	1.9752	6.30898	7.02503	2.5898	122	120	1.16934e-06	0.000174922	7.83904	0.000177837	7.80742	8.31692	8.16102	79.2521	71.1741	6262.95	5749.19	0	10.4	SW	10.4	15	SWs	15	93	GPs	93	112	SFs
195	ISPRA	39.0406	16.1485	300	236	36	15.4375	2.182	6.58744	7.33509	2.216	122	120	9.05735e-07	0.000135489	8.09221	0.000137747	8.06047	8.22864	9.10413	75.902	68.1655	4416.37	3924.32	0	1	PT	1	64	SF	64	100	SFs
196	ISPRA	39.0401	16.156	235	170	35	15.6953	1.758	5.79014	6.4473	2.044	122	120	1.03693e-06	0.000155114	7.95815	0.000157699	7.92647	7.16895	7.7146	86.3537	77.5518	5156.1	4596.3	0	7.5	SW	7.5	26	SM	26	65	SF	65	100	SFs
197	ISPRA	38.9775	16.2931	490	414.4	24.4	14.6841	2.11	6.45552	7.1882	2.28	122	120	9.63692e-07	0.000144159	8.03074	0.000146562	7.99902	7.7216	9.27321	77.4531	69.5584	4527.02	4024.92	0	5	PT	5	75.6	SF	75.6	100	SFs
198	ISPRA	38.9809	16.317	308	274.8	66.8	15.4058	2.11	6.45552	7.1882	2.17	122	120	9.17198e-07	0.000137204	8.07975	0.000139491	8.04801	8.01884	8.90283	77.4531	69.5584	4573.02	4070.92	0	5	GP	5	33.2	SF	33.2	100	SFs
199	ISPRA	38.9867	16.3146	450	401	51	14.8427	2.2	6.62042	7.37181	2.2	122	120	8.91838e-07	0.00013341	8.10754	0.000135634	8.07578	7.98555	9.42524	75.5239	67.8259	4389.32	3899.73	0	49	SF	49	100	SFs
200	ISPRA	38.9754	16.3412	396	373.6	77.6	15.0569	2.146	6.52148	7.26165	2.248	122	120	9.34227e-07	0.000139751	8.06152	0.00014208	8.02978	7.97208	9.19278	76.6697	68.8549	4471.19	3974.17	0	3	PT	3	22.4	SF	22.4	100	SFs
201	ISPRA	38.9738	16.3414	390	368.6	78.6	15.0806	2.146	6.52148	7.26165	2.248	122	120	9.34227e-07	0.000139751	8.06152	0.00014208	8.02978	7.9832	9.18181	76.6697	68.8549	4471.19	3974.17	0	3	PT	3	21.4	SF	21.4	100	SFs
202	ISPRA	39.0112	16.3246	812	772	60	13.4072	2.2	6.62042	7.37181	2.2	122	120	8.91838e-07	0.00013341	8.10754	0.000135634	8.07578	7.30493	10.0965	75.5239	67.8259	4389.32	3899.73	0	40	SF	40	100	SFs
203	ISPRA	39.0114	16.3268	825	795	70	13.3556	2.128	6.4885	7.22493	2.264	122	120	9.48835e-07	0.000141936	8.04614	0.000144302	8.01441	7.14199	9.92843	77.0594	69.2049	4498.98	3999.43	0	4	PT	4	30	SF	30	100	SFs
204	ISPRA	39.02	16.3194	760	734.6	74.6	13.6134	2.11	6.45552	7.1882	2.28	122	120	9.63692e-07	0.000144159	8.03074	0.000146562	7.99902	7.22607	9.76193	77.4531	69.5584	4527.02	4024.92	0	5	PT	5	25.4	SF	25.4	100	SFs
205	ISPRA	39.0283	16.3307	1048	1024.7	76.7	12.4713	2.1625	6.5465	7.28951	2.185	122	120	9.01117e-07	0.000134798	8.09728	0.000137045	8.06553	6.78005	10.4096	76.3766	68.5917	4474.05	3978.93	0	2.5	GM	2.5	23.3	SF	23.3	100	SFs
206	ISPRA	39.031	16.3306	1045	1015.8	70.8	12.4832	2.1625	6.5465	7.28951	2.185	122	120	9.01117e-07	0.000134798	8.09728	0.000137045	8.06553	6.78562	10.4041	76.3766	68.5917	4474.05	3978.93	0	2.5	GM	2.5	29.2	SF	29.2	100	SFs
207	ISPRA	38.9782	16.1571	80	45	65	16.31	1.2	4.50549	5.01685	2.77	122	120	2.05866e-06	0.000307955	7.27847	0.000313088	7.24712	5.85923	5.9022	110.976	99.6642	7606.68	6991.33	0	18	GP	18	35	CH	35	100	CHs
208	ISPRA	38.9789	16.1646	200	185	85	15.8341	1.41	4.89441	5.44991	2.88	122	120	1.82163e-06	0.000272497	7.39971	0.000277039	7.36829	6.42409	6.81205	102.157	91.7446	7283.36	6716.91	0	15	GP	15	40	GPs	40	100	CHs
[truncated: 19 more columns]
